# Supplementary material for: Design and evaluation of BOOGIE: a collector for the analysis of cloud composition and processes
Source: Copernicus journal article supplement (doi:10.5194/amt-18-1073-2025), 2025-03-04
Supplement: Supplementary file 1 [file amt-18-1073-2025-supplement.zip]

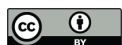

## *Supplement of*

# **Design and evaluation of BOOGIE: a collector for the analysis of cloud composition and processes**

**Mickael Vaitilingom et al.**

*Correspondence to:* Mickael Vaitilingom ([mickael.vaitilingom@univ-antilles.fr](mailto:mickael.vaitilingom@univ-antilles.fr)) and  
Laurent Deguillaume ([laurent.deguillaume@uca.fr](mailto:laurent.deguillaume@uca.fr))

- [amt-18-1073-2025-supplement-title-page.pdf](#)
- [A new cloud water collector \\_final\\_review\\_SI-changeaccepted.docx](#)
- [Sampler-assembly.mp4](#)

The copyright of individual parts of the supplement might differ from the article licence.
